# Supplementary material
Source: PubMed Central journal article supplement (PMC3740746)
Supplement: NIHMS488189-supplement-1.pdf [file NIHMS488189-supplement-1.pdf]

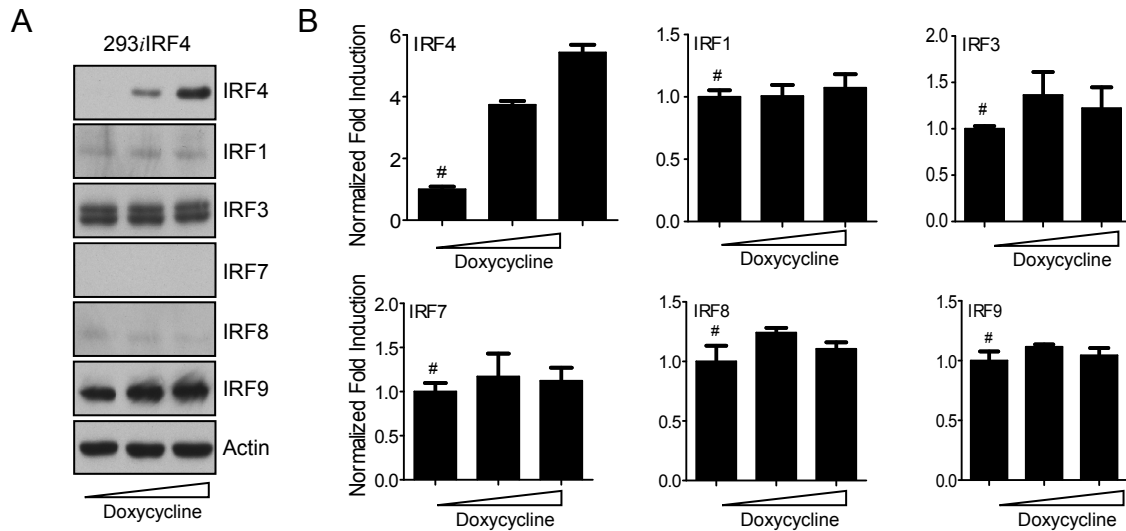

**Supplementary Figure 1. IRF4 induces ISG expression independent from other IRF proteins.**

(A) Analysis of IRF protein induction in 293iIRF4 cells. Following 48 h Dox stimulation, lysates were prepared as previously described and immunoblotted with antibodies against IRF4, IRF1, IRF3, IRF7, IRF8, IRF9, and Actin.

(B) Analysis of IRF mRNA induction in 293iIRF4 cells. Following 48 h Dox stimulation as indicated, total RNA was harvested from  $1 \times 10^6$  cells/sample and subjected to qRT-PCR to detect expression of IRF4, IRF1, IRF3, IRF7, IRF8, IRF9. Samples were normalized to RPL32 and expressed as fold change with respect to untreated cells (value 1), marked with (#).
