# Supplementary material
Source: PubMed Central journal article supplement (PMC3740746)
Supplement: NIHMS488189-supplement-2.pdf [file NIHMS488189-supplement-2.pdf]

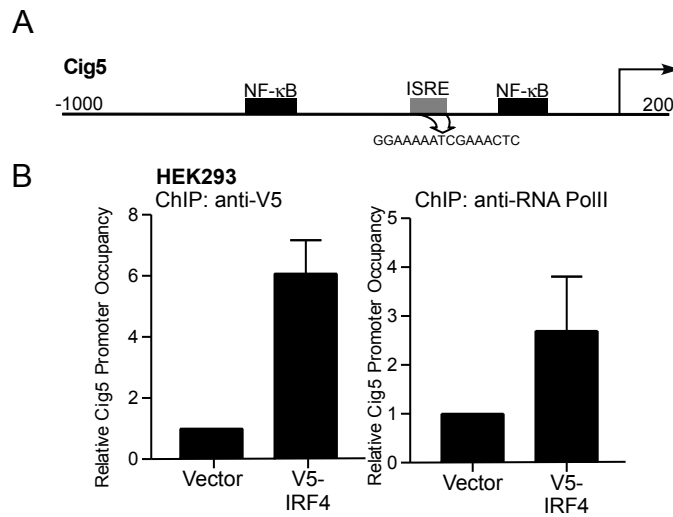

**Supplementary Figure 2. IRF4 binding to Cig5 Promoter.**

(A) Schematic representation of the Cig5 promoter-regulatory region depicting position of ISRE (gray) and their sequences as predicted using TRED.

(B) Chromatin-immunoprecipitation of IRF4 bound to Cig5 promoter in cells stably expressing IRF4-V5 (HEK293/pLenti-IRF4-V5) or vector control (HEK293/pLenti). IRF4 and Pol II binding to the Cig5 promoter was analyzed by ChIP assay as previously described.
