# Supplementary material
Source: PubMed Central journal article supplement (PMC3740746)
Supplement: NIHMS488189-supplement-3.pdf [file NIHMS488189-supplement-3.pdf]

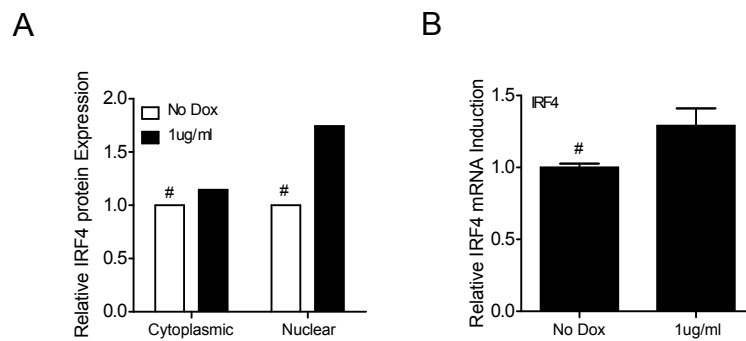

**Supplementary Figure 3. IRF4 protein and mRNA expression in BCBL-1/IRF4 cells stimulated with Doxycycline.**

(A) Quantitation of IRF4 protein induction after doxycycline stimulation. IRF4 expression levels were quantified using densitometry analysis and expressed as relative expression with respect to untreated vector control cells (value 1), marked with (#).

(B) Induction of IRF4 mRNA in BCBL-1/IRF4 cells by doxycycline. Cells were stimulated with doxycycline for 48 h. Fold induction of IRF4 mRNA levels were normalized to RPL32 and expressed as fold change with respect to untreated cells (value 1), marked with (#).
