# Supplementary material
Source: PubMed Central journal article supplement (PMC3740746)
Supplement: NIHMS488189-supplement-4.pdf [file NIHMS488189-supplement-4.pdf]

**Supplementary Table 1. List of Primers used for Real-time PCR in this study.**

|              |         |                                      |
|--------------|---------|--------------------------------------|
| RPL32        | Forward | 5' - CAACATTGGTTATGGAAGCAACA - 3'    |
|              | Reverse | 5' - TGACGTTGTGGACCAGGAACT - 3'      |
| IRF4         | Forward | 5' - ACCCGCAGATGTCCATGAG - 3'        |
|              | Reverse | 5' - GTGGCATCATGTAGTTGTGAACCT - 3'   |
| Cig5/Viperin | Forward | 5' - CAGTGCTTGCATTGCTTTGT - 3'       |
|              | Reverse | 5' - CAAGGTTCCAGCGTGATTTT - 3'       |
| OasL         | Forward | 5' - GGACCGTGGAGGAGTTTCTG - 3'       |
|              | Reverse | 5' - GAGCCCACCTTGACTACCTTC - 3'      |
| IFN $\beta$  | Forward | 5' - TGGGAGGATTCTGCATTACC - 3'       |
|              | Reverse | 5' - CAGCATCTGCTGGTTGAAGA - 3'       |
| IFN $\alpha$ | Forward | 5' - GTGAGGAAATACTTCCAAAGAATCAC - 3' |
|              | Reverse | 5' - TCTCATGATTTCTGCTCTGACAA - 3'    |
| IRF7         | Forward | 5' - TACCATCTACCTGGGCTTCG - 3'       |
|              | Reverse | 5' - AGGGTCCAGCTTCACCA - 3'          |
| MxA          | Forward | 5' - AGGTCAGTTACCAGGACTAC - 3'       |
|              | Reverse | 5' - ATGGCATTCTGGGCTTTATT - 3'       |
| ISG15        | Forward | 5' - ACTCATCTTTGCCAGTACAGGAG - 3'    |
|              | Reverse | 5' - CAGCATCTTCACCGTCAGGTC - 3'      |
| PKR          | Forward | 5' - TCTGACTACCTGTCTCTGGTTCTT - 3'   |
|              | Reverse | 5' - GCGAGTGTGCTGGTCACTAAAG - 3'     |
| K13          | Forward | 5' -GGATGCCCTAATGTCAATGC - 3'        |
|              | Reverse | 5' - GGCGATAGTGTTGG GTGT- 3'         |
| LANA         | Forward | 5' - AACTCATTCTCCATCTCCTGCATTGC - 3' |
|              | Reverse | 5' - TTCCTGTAGGACTTGAAAGCGGT - 3'    |
| LANA2        | Forward | 5' - CTCTTTGATCTGCTTGGCATCC - 3'     |
|              | Reverse | 5' - TTGCATCCGTGTCGCCT- 3'           |
| ORF50        | Forward | 5' - TGGTGAAGATGTGTGCATT- 3'         |
|              | Reverse | 5' - CTCCGTGAGGATCCGAATAA- 3'        |
| ORF57        | Forward | 5' - GGGTGGTTTGATGAGAAGGA - 3'       |
|              | Reverse | 5' - CGCTACCAAATATGCCACCT - 3'       |
